# Supplementary figures and images for: Viral Transduction of Human Rod Opsin or Channelrhodopsin Variants to Mouse ON Bipolar Cells Does Not Impact Retinal Anatomy or Cause Measurable Death in the Targeted Cells
Source: MDPI journal article supplement (doi:10.3390/ijms222313111), 2021-12-03

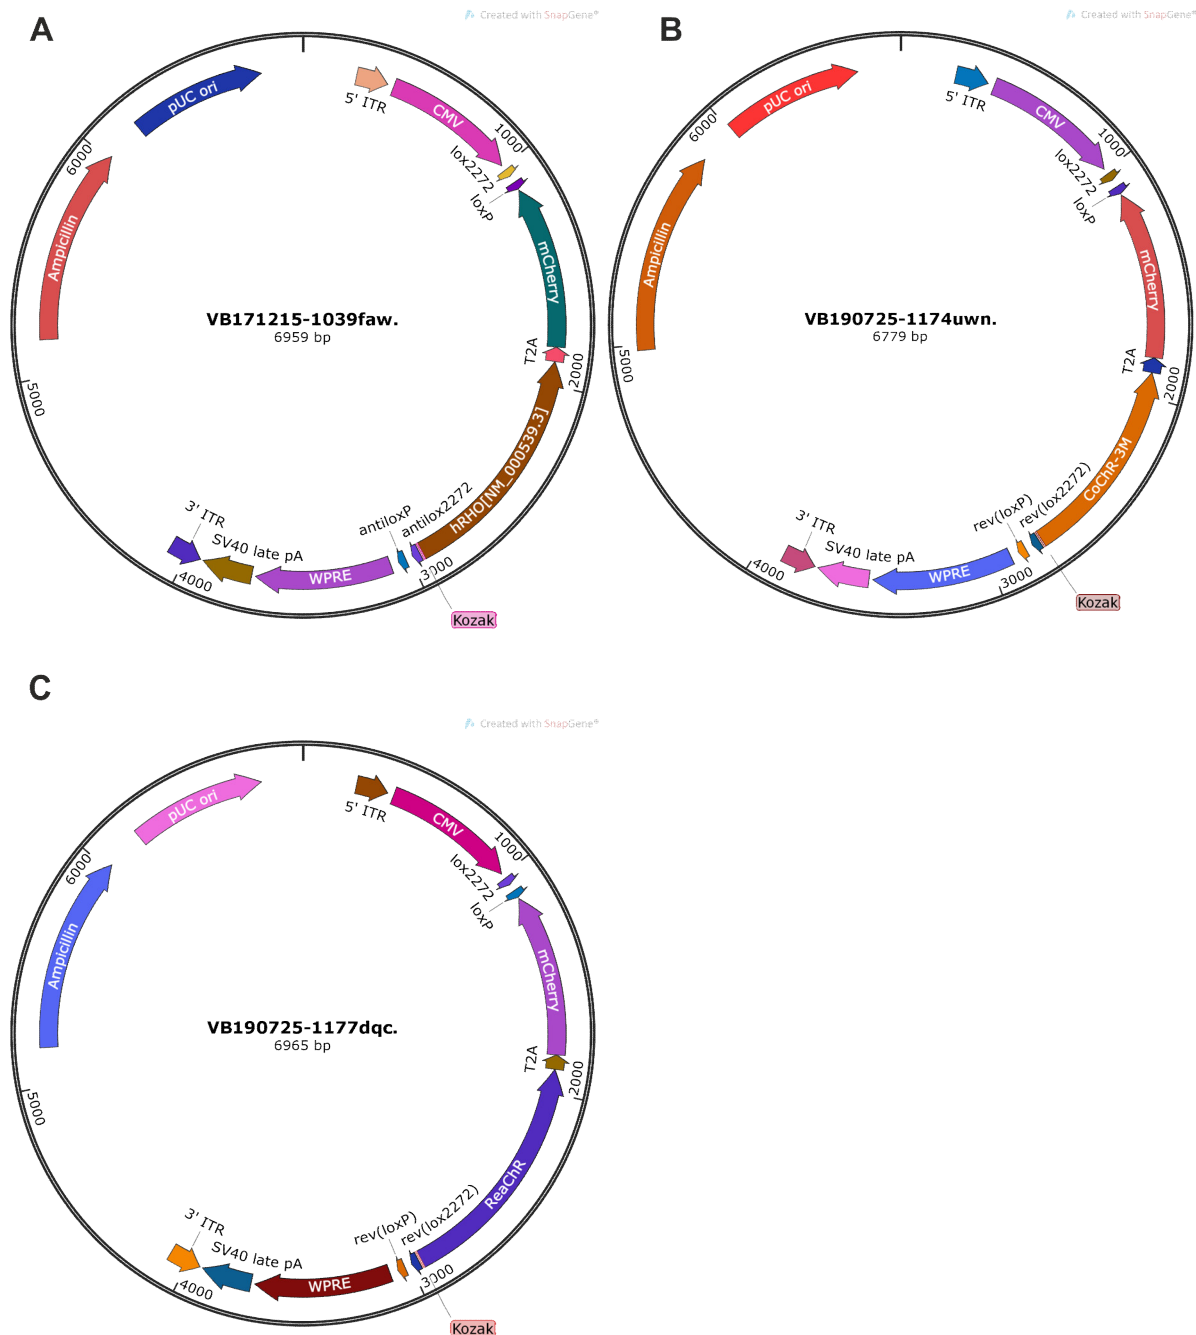

**Supplementary Figure S1.** Viral vector maps of human Rod opsin (A), CoChR-3M (B), ReaChR (C).

Supplement: s1 [file s1]
